# Supplementary material for: Pretreatment neutrophil-to-lymphocyte ratio predicts treatment efficacy and prognosis of cytotoxic anticancer drugs, molecular targeted drugs, and immune checkpoint inhibitors in patients with advanced non-small cell lung cancer
Source: PubMed Central journal article supplement — Transl Lung Cancer Res. 2021 Jan;10(1):221–32. doi: 10.21037/tlcr-20-777 (PMC7867774; doi:10.21037/tlcr-20-777), 2021-01
Supplement: tlcr-10-01-221-dss.pdf [file tlcr-10-01-221-dss.pdf]

## Data Sharing Statement

|                     |                                                                                                                                                     |                                                                           |
|---------------------|-----------------------------------------------------------------------------------------------------------------------------------------------------|---------------------------------------------------------------------------|
| <b>Article Info</b> | <a href="http://dx.doi.org/10.21037/tlcr-20-777">http://dx.doi.org/10.21037/tlcr-20-777</a>                                                         |                                                                           |
| <b>Item</b>         | <b>Question</b>                                                                                                                                     | <b>Authors' Response<br/>(place - if not applicable)</b>                  |
| 1                   | Would you like to share data collected for your study to others?                                                                                    | Yes                                                                       |
| 2                   | If not, would you like to share the reason for your decision?                                                                                       | -                                                                         |
| 3                   | What data in particular will be shared?                                                                                                             | De-identified individual patient data                                     |
| 4                   | Any other documents will be shared? Such as study protocol, statistical analysis plan, informed consent form, clinical study report, analytic code. | -                                                                         |
| 5                   | When will data availability begin?                                                                                                                  | Immediately following publication                                         |
| 6                   | When will data availability end?                                                                                                                    | No end data                                                               |
| 7                   | To whom will you share the data?                                                                                                                    | Researchers who provide a methodologically sound proposal                 |
| 8                   | For what type of analysis or purpose?                                                                                                               | To achieve aims in the approved proposal                                  |
| 9                   | How or where can the data/documents be obtained?                                                                                                    | Via email request to Dr. Masashi Ishihara (m.ishihara@med.teikyo-u.ac.jp) |
| 10                  | Any other restrictions?                                                                                                                             | No restrictions                                                           |
